# Supplementary material for: Silica-coated super-paramagnetic iron oxide nanoparticles (SPIONPs): a new type contrast agent of T1 magnetic resonance imaging (MRI)
Source: Royal Society of Chemistry journal article supplement (doi:10.1039/c5tb00300h), 2015-01-01
Supplement: c5tb00300h1.pdf [file c5tb00300h1.pdf]

## Supporting Information

### Silica Coated Super-paramagnetic Iron Oxide Nanoparticles (SPIONPs): A New Type Contrast Agent of T<sub>1</sub> Magnetic Resonance Imaging (MRI)

M. Zubair Iqbal, Xuehua Ma, Tianxiang Chen, Ling'e Zhang, Wenzhi Ren, Lingchao Xiang, Aiguo Wu\*

Key Laboratory of Magnetic Materials and Devices, & Division of Functional Materials and Nanodevices, Ningbo Institute of Materials Technology and Engineering, Chinese Academy of Sciences, No. 1219 ZhongGuan West Road, 315201, Ningbo, China

---

\*Corresponding author Email: aiguo@nimte.ac.cn

Tel: 86 574 87617278; Fax: +86-57486685163

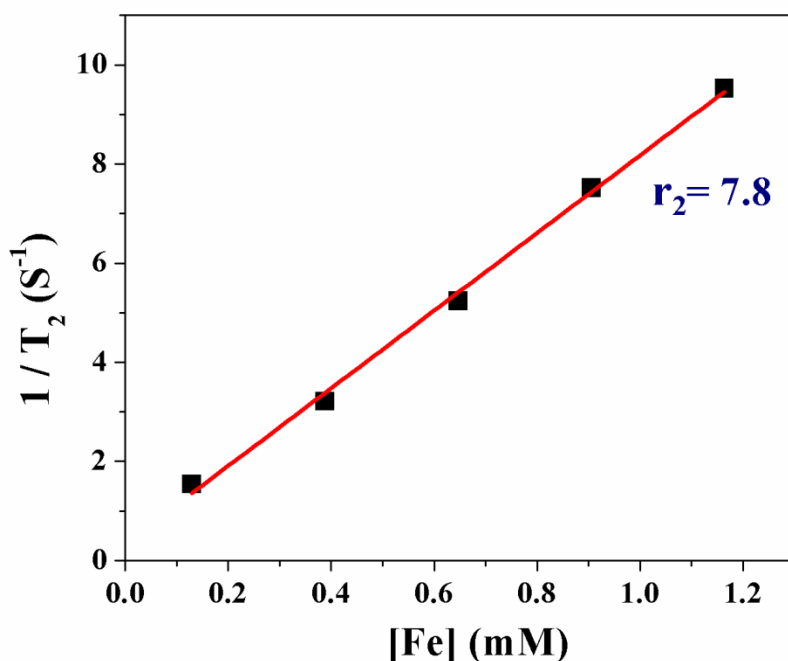

**Figure S1.** The transverse (T<sub>2</sub>) relaxation time of silica coated SPIONPs

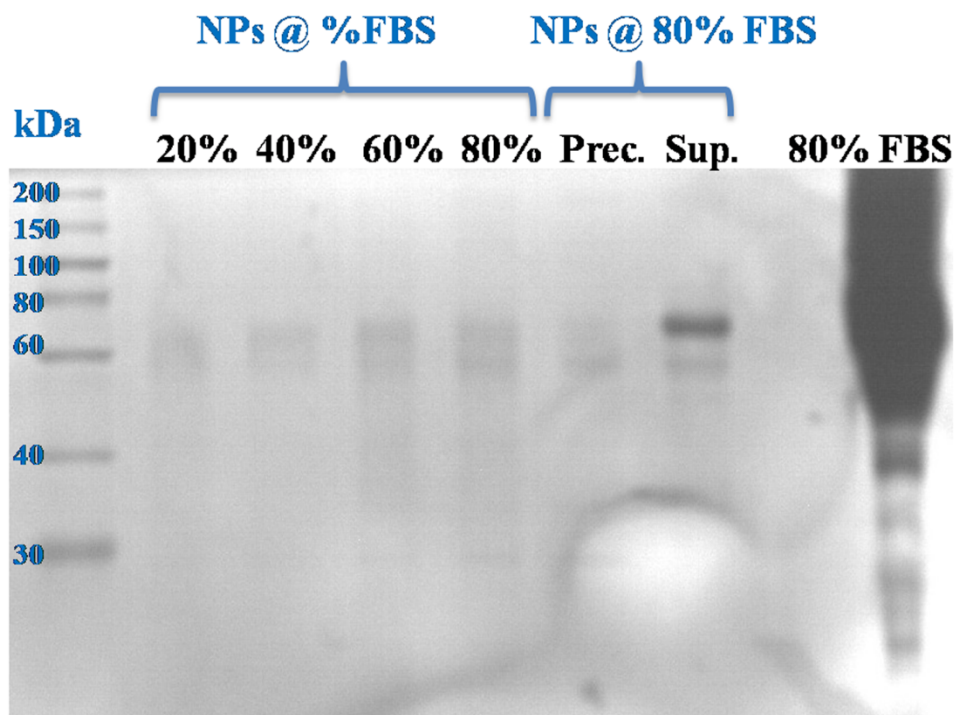

**Figure S2.** SDS-PAGE gel of the protein corona of the as-synthesized NPs after incubation in fetal bovine serum (FBS) medium for 24 hours
